# Supplementary material
Source: PubMed Central journal article supplement (PMC3870604)
Supplement: Supp_Fig1.pdf [file Supp_Fig1.pdf]

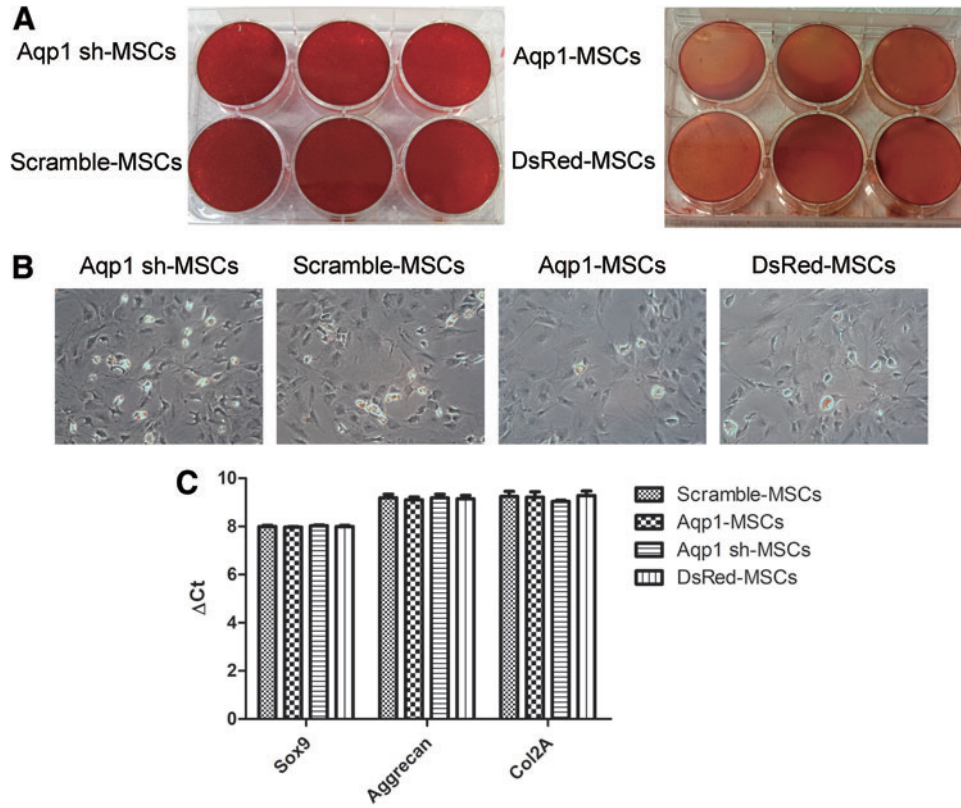

**SUPPLEMENTARY FIG. S1.** Osteogenesis, adipogenesis, and chondrogenesis potentials of aquaporin 1 (Aqp1)-depleted and overexpressing mesenchymal stem cells (MSCs). Aqp1-shMSCs, Scramble MSCs, Aqp1-MSCs, and DsRed-MSCs were induced to osteogenesis and adipogenesis for 3 weeks and stained with Alizarin Red S (**A**) and Oil Red O (**B**), respectively. The chondrogenic genes Sox9, aggrecan, and collagen type 2A (Col2A) were detected after inducing for 2 weeks (**C**).
