# Supplementary material
Source: PubMed Central journal article supplement (PMC3870604)
Supplement: Supp_Fig2.pdf [file Supp_Fig2.pdf]

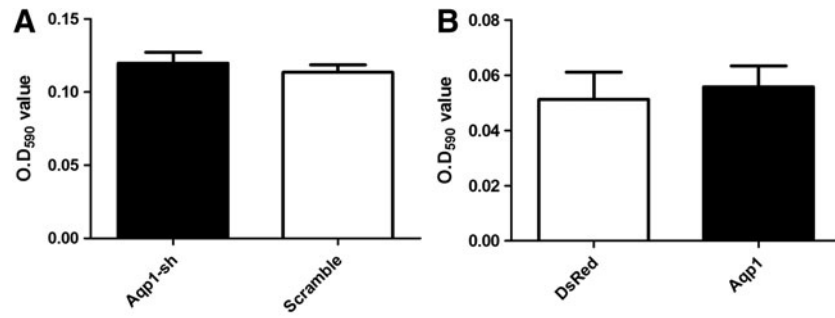

**SUPPLEMENTARY FIG. S2.** Proliferation rate of Aqp1-depleted and overexpressing MSCs. Aqp1-shMSCs, Scramble MSCs, Aqp1-MSCs, and DsRed-MSCs ( $2 \times 10^3$ /well) were inoculated into 96-well plates and incubated overnight. MTT was then added (5 mg/mL) for 4 h, and the OD value of the wave length of 595 nm was detected. No significant difference ( $p > 0.05$ , t-test) was found between the groups.
