# Supplementary material
Source: PubMed Central journal article supplement (PMC3870604)
Supplement: Supp_Fig3.pdf [file Supp_Fig3.pdf]

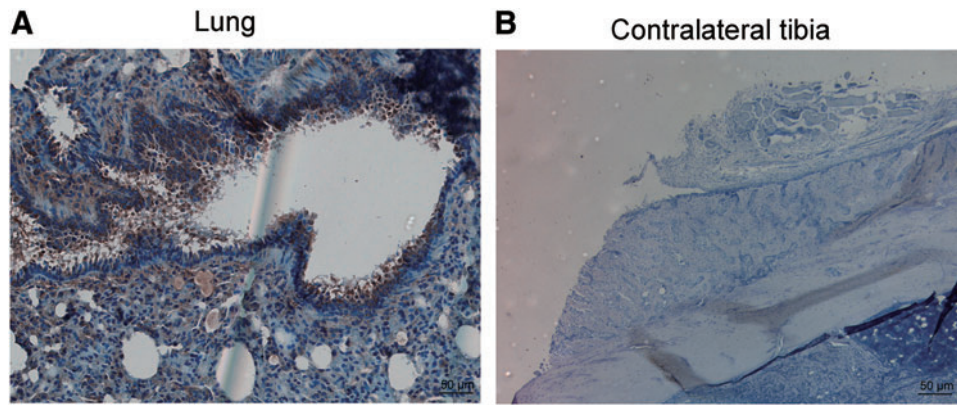

**SUPPLEMENTARY FIG. S3.** Representative images show the immunostaining data of the green fluorescent protein (GFP)-MSCs in the lung and contralateral tibia tissues. Samples of lung and contralateral (intact) tibia of the fractured rats were stained with the GFP antibody. Strong positive signals were seen in the lung (**A**), while a negative signal was seen in the contralateral intact tibia (**B**). Scale bar: 100  $\mu$ m.
