# Supplementary material
Source: PubMed Central journal article supplement (PMC3870604)
Supplement: Supp_Fig4.pdf [file Supp_Fig4.pdf]

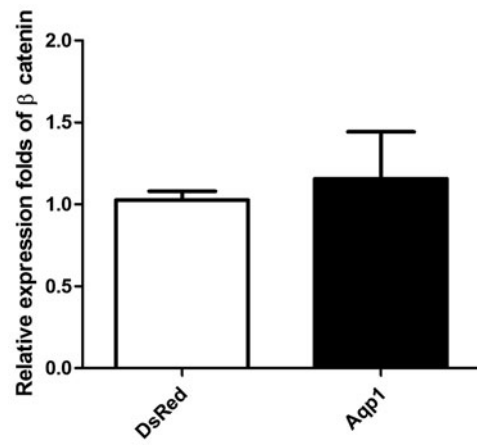

**SUPPLEMENTARY FIG. S4.** Real-time polymerase chain reaction (PCR) data of  $\beta$ -catenin in Aqp1 overexpressing MSCs. The mRNA level of  $\beta$ -catenin was detected in the Aqp1-MSCs and DsRed-MSCs, with no significant difference.
