# Supplementary material
Source: PubMed Central journal article supplement (PMC3870604)
Supplement: Supp_Fig5.pdf [file Supp_Fig5.pdf]

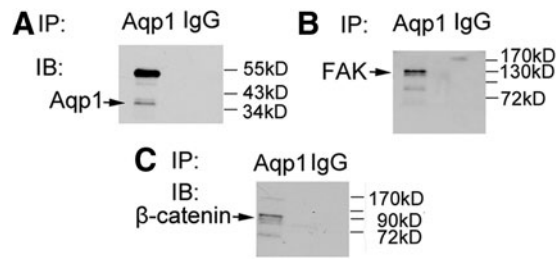

**SUPPLEMENTARY FIG. S5.** Immunoprecipitation data of Aqp1,  $\beta$ -catenin, and focal adhesion kinase (FAK). Total proteins of MSCs were collected and pulled down by the Aqp1 antibody and IgG control. The co-immunoprecipitation product was blotted with the Aqp1 antibody (**A**), FAK antibody (**B**), and  $\beta$ -catenin antibody (**C**), respectively.
