# Supplementary material
Source: PubMed Central journal article supplement (PMC3870604)
Supplement: Supp_Fig6.pdf [file Supp_Fig6.pdf]

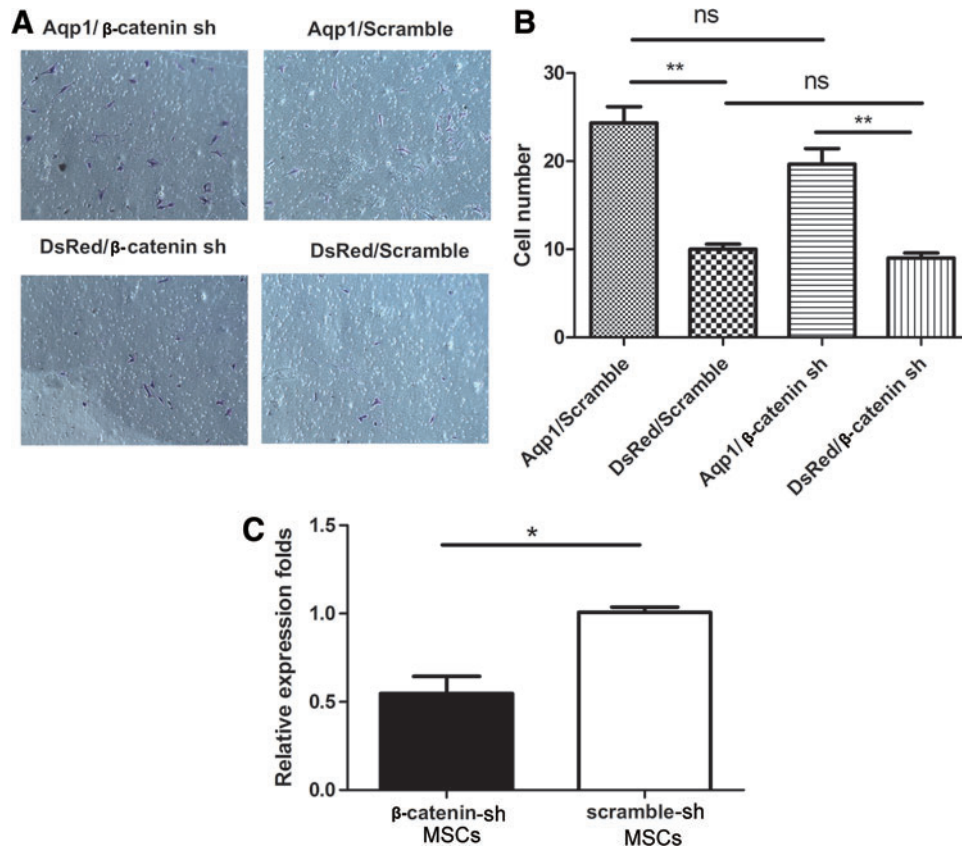

**SUPPLEMENTARY FIG. S6.** Transwell cell migration analysis of Aqp1-MSCs after depletion of  $\beta$ -catenin.  $\beta$ -catenin was silenced in both Aqp1-MSCs and DsRed-MSCs by lentivirus transfection. Cells that migrated across the membrane were stained with *violet purple* (**A**) and quantified (**B**). The mRNA level of  $\beta$ -catenin was reduced by real-time PCR after transfection of  $\beta$ -catenin-shRNA in MSCs (**C**). All error bars represent SEM (\* $P$  < 0.05, \*\* $P$  < 0.01, ns, none significance).
