# Supplementary material
Source: PubMed Central journal article supplement (PMC3870604)
Supplement: Supp_Fig7.pdf [file Supp_Fig7.pdf]

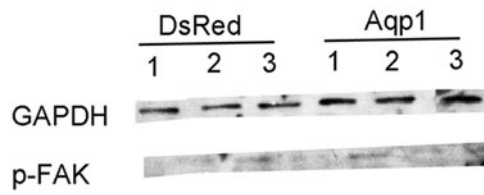

**SUPPLEMENTARY FIG. S7.** Western blot of p-FAK in Aqp1-MSCs and DsRed-MSCs. Total protein of Aqp1-MSCs and DsRed-MSCs was extracted and blotted with p-FAK (Y397) and GAPDH antibodies.
